# Supplementary material for: Diagnosis Across the Spectrum of Progressive Supranuclear Palsy and Corticobasal Syndrome
Source: PubMed Central journal article supplement (PMC6990759; doi:10.1001/jamaneurol.2019.4347), 2019-12-20
Supplement: jamaneurol-77-377-s001.pdf [file jamaneurol-77-377-s001.pdf]

## Supplementary Online Content

Jabbari E, Holland N, Chelban V, et al. Diagnosis across the spectrum of progressive supranuclear palsy and corticobasal syndrome. *JAMA Neurol.* Published online December 20, 2019. doi:10.1001/jamaneurol.2019.4347

**eTable 1.** Overview of Planned Assessments in the PROSPECT Study Natural History Cohort

**eTable 2.** Clinical Rating Scales, Functional Rating Scales, and Cognitive Screening Tests Used in the PROSPECT Study Natural History Cohort

**eTable 3.** Cognitive Screening Measures in the PROSPECT Study Natural History Cohort

**eTable 4.** Genetic Analyses in the PROSPECT Study Natural History Cohort

**eTable 5.** Volumetric MRI Measures in the PROSPECT Study Natural History Cohort

**eMethods.** Fluid Biomarkers, Genetics, and Neuroimaging

**eFigure.** Serum NF-L ROC Curve for APS vs PD

**eReferences.**

This supplementary material has been provided by the authors to give readers additional information about their work.

**eTable 1. Overview of Planned Assessments in the PROSPECT Study Natural History Cohort**

|                                                       | Study visit |    |     |     |     |     |     |
|-------------------------------------------------------|-------------|----|-----|-----|-----|-----|-----|
|                                                       | 0m          | 6m | 12m | 24m | 36m | 48m | 60m |
| <b>Core study assessments</b>                         |             |    |     |     |     |     |     |
| Clinical rating scales                                | ✓           | ✓  | ✓   | ✓   | ✓   | ✓   | ✓   |
| Functional rating scales                              | ✓           | ✓  | ✓   | ✓   | ✓   | ✓   | ✓   |
| Cognitive screening tests                             | ✓           | ✓  | ✓   | ✓   | ✓   |     |     |
| Neuropsychometric tests                               | ✓           | ✓  | ✓   | ✓   | ✓   |     |     |
| Blood sample for biomarkers (and genetics at 0m only) | ✓           | ✓  | ✓   | ✓   | ✓   |     |     |
| Smell test                                            | ✓           |    |     |     |     |     |     |
| <b>Optional biomarker assessments</b>                 |             |    |     |     |     |     |     |
| Skin biopsy                                           | ✓           |    | ✓   |     |     |     |     |
| Magnetic resonance imaging                            | ✓           |    | ✓   |     |     |     |     |
| Cerebrospinal fluid collection                        | ✓           | ✓  | ✓   |     |     |     |     |

**eTable 2. Clinical Rating Scales, Functional Rating Scales, and Cognitive Screening Tests Used in the PROSPECT Study Natural History Cohort**

|                              | Study visit |    |     |     |     |     |     |
|------------------------------|-------------|----|-----|-----|-----|-----|-----|
|                              | 0m          | 6m | 12m | 24m | 36m | 48m | 60m |
| <b>Clinician assessed</b>    |             |    |     |     |     |     |     |
| PSPRS/UMSARS                 | ✓           | ✓  | ✓   | ✓   | ✓   | ✓   | ✓   |
| MDS UPDRS-III                | ✓           | ✓  | ✓   | ✓   | ✓   | ✓   | ✓   |
| SEADL                        | ✓           | ✓  | ✓   | ✓   | ✓   | ✓   | ✓   |
| MoCA                         | ✓           | ✓  | ✓   | ✓   | ✓   |     |     |
| ECAS                         | ✓           | ✓  | ✓   | ✓   | ✓   |     |     |
| ACE-III                      | ✓           | ✓  | ✓   | ✓   | ✓   |     |     |
| <b>Patient self-assessed</b> |             |    |     |     |     |     |     |
| MDS UPDRS-II                 | ✓           | ✓  | ✓   | ✓   | ✓   | ✓   | ✓   |

Addenbrooke's cognitive examination 3: ACE-III, Edinburgh cognitive and behavioural ALS screen: ECAS, Montreal cognitive assessment: MoCA, Schwab and England activities of daily living scale: SEADL, PSP rating scale: PSPRS, Unified Multiple System Atrophy rating scale: UMSARS, Movement Disorder Society Unified Parkinson's Disease Rating Scale part II: MDS UPDRS-II, Movement Disorder Society Unified Parkinson's Disease Rating Scale part III: MDS UPDRS-III.

**eTable 3. Cognitive Screening Measures in the PROSPECT Study Natural History Cohort**

|                                  | Controls               | PSP-<br>All           | PSP-<br>RS            | PSP-<br>Subcortical   | PSP-<br>Cortical     | CBS-<br>All          | CBS-<br>unknown       | CBS-<br>4RT         | CBS-<br>AD          | IDT                  | PD**                   |
|----------------------------------|------------------------|-----------------------|-----------------------|-----------------------|----------------------|----------------------|-----------------------|---------------------|---------------------|----------------------|------------------------|
| <b>MoCA - n, mean, (SD)</b>      | 76<br>26.8†<br>(2.2)   | 96<br>21.9<br>(4.7)   | 51<br>22.5✕<br>(3.6)  | 22<br>23.1✕<br>(5.0)  | 23<br>19.7<br>(6.0)  | 39<br>20.4<br>(7.4)  | 23<br>21.8ϕ<br>(6.1)  | 9<br>22.9ϕ<br>(5.3) | 7<br>12.4<br>(9.0)  | 24<br>21.9<br>(6.5)  | 1833<br>24.9*<br>(3.6) |
| <b>ECAS - n, mean, (SD)</b>      | 76<br>116.3†<br>(10.6) | 86<br>88.7<br>(22.1)  | 46<br>89.4✕<br>(17.8) | 21<br>97.0✕<br>(22.0) | 19<br>78.3<br>(27.8) | 27<br>84.3<br>(33.0) | 14<br>96.7ϕ<br>(24.9) | 7<br>88.1<br>(26.6) | 6<br>55.0<br>(39.0) | 22<br>95.3<br>(18.8) | -                      |
| <b>ACE-III - n, mean, (SD)</b>   | 76<br>95.1†<br>(5.3)   | 91<br>78.8Ω<br>(13.1) | 50<br>80.5✕<br>(9.5)  | 20<br>84.0✕<br>(9.8)  | 21<br>69.8<br>(18.6) | 31<br>71.9<br>(23.5) | 17<br>76.3ϕ<br>(20.1) | 7<br>78.1<br>(17.0) | 7<br>54.3<br>(31.2) | 25<br>80.7<br>(12.1) | -                      |
| <b>Attention - mean, (SD)</b>    | 17.3*<br>(1.2)         | 15.8Ω<br>(2.3)        | 15.8<br>(2.1)         | 16.7✕<br>(1.9)        | 14.9<br>(2.3)        | 14.3<br>(4.1)        | 14.8ϕ<br>(3.2)        | 16.1ϕ<br>(2.5)      | 10.8<br>(5.7)       | 16.8<br>(2.1)        | -                      |
| <b>Memory - mean, (SD)</b>       | 24.4†<br>(2.6)         | 21.0Ω<br>(4.6)        | 21.6✕<br>(3.5)        | 21.8<br>(4.4)         | 18.5<br>(6.4)        | 18.4<br>(7.3)        | 19.6<br>(7.5)         | 20.0ϕ<br>(4.9)      | 13.7<br>(5.8)       | 19.5<br>(4.1)        | -                      |
| <b>Fluency - mean, (SD)</b>      | 12.3†<br>(1.6)         | 6.4<br>(3.4)          | 6.3<br>(3.0)          | 7.9✕<br>(3.2)         | 5.3<br>(3.9)         | 7.3<br>(4.1)         | 8.4<br>(3.4)          | 6.5<br>(4.4)        | 5.7<br>(5.2)        | 7.6<br>(4.1)         | -                      |
| <b>Language - mean, (SD)</b>     | 25.7†<br>(0.6)         | 23.4Ω<br>(3.8)        | 23.9✕<br>(2.3)        | 24.8✕<br>(1.5)        | 20.5<br>(6.6)        | 21.5<br>(6.0)        | 22.5ϕ<br>(4.7)        | 23.6ϕ<br>(2.3)      | 16.6<br>(8.1)       | 23.6<br>(3.4)        | -                      |
| <b>Visuospatial - mean, (SD)</b> | 15.4†<br>(1.0)         | 12.2Ω<br>(3.1)        | 12.6✕<br>(2.5)        | 12.9✕<br>(2.9)        | 10.4<br>(3.8)        | 10.4<br>(4.9)        | 11.0<br>(4.5)         | 11.9<br>(5.4)       | 7.4<br>(5.7)        | 13.5<br>(2.3)        | -                      |

Cognitive screening measures in PROSPECT study natural history cohort. Addenbrooke's cognitive examination 3: ACE-III, Edinburgh cognitive and behavioural ALS screen: ECAS, Indeterminate: IDT, PSP-Richardson syndrome: PSP-RS, Montreal cognitive assessment: MoCA, CBS-Alzheimer's disease: CBS-AD, CBS-4 repeat tau: CBS-4RT, Parkinson's disease: PD, standard deviation: SD. Group and sub-group comparisons made with logistic regression analyses that used gender, age at symptom onset and disease duration at testing as covariates - † = FDR adjusted P<0.05 vs. all disease groups, \* = FDR adjusted P<0.05 vs. PSP All and CBS All, Ω = FDR adjusted P<0.05 vs. CBS All, ϕ = FDR adjusted P<0.05 vs. CBS-AD, ✕ = FDR adjusted P<0.05 vs. PSP-Cortical, \*\* = data from the Tracking Parkinson's study.

**eTable 4. Genetic Analyses in the PROSPECT Study Natural History Cohort**

|                                            | Controls* | PSP-All | PSP-RS | PSP-Subcortical | PSP-Cortical | CBS-All | CBS-unknown | CBS-4RT | CBS-AD | IDT  | PD**  |
|--------------------------------------------|-----------|---------|--------|-----------------|--------------|---------|-------------|---------|--------|------|-------|
| <b>No. of cases genotyped</b>              | -         | 81      | 42     | 20              | 19           | 33      | 20          | 6       | 7      | 20   | 1566  |
| <b><i>MAPT</i> H1/H1 frequency (%)</b>     | 67.1      | 88.9    | 90.5   | 85.0            | 89.5         | 78.8    | 80.0        | 83.3    | 71.4   | 75.0 | 67.2‡ |
| <b><i>APOE</i>-ε4 allele frequency (%)</b> | 15.1      | 6.8     | 9.5    | 2.5             | 5.3          | 12.1    | 7.5         | 0 ϕ     | 35.7   | 10.0 | 12.8Ω |
| <b><i>TRIM11</i> (rs564309) MAF (%)</b>    | 9.6       | 9.3     | 7.1    | 15.0            | 7.9          | 12.1    | 10.0        | 33.3ϕ   | 0      | 25.0 | 14.7  |

Genetic analyses in the PROSPECT study natural history cohort. Apolipoprotein E: *APOE*, Indeterminate: IDT, PSP Richardson syndrome: PSP-RS, minor allele frequency: MAF, microtubule associated protein tau: *MAPT*, CBS-Alzheimer's disease: CBS-AD, CBS-4 repeat tau: CBS-4RT, Parkinson's disease: PD, tripartite motif-containing protein 11: *TRIM11*. Group and sub-group comparisons of genetic data made with Fisher's exact test - ‡ = Bonferroni corrected P<0.05 vs. PSP-All and CBS-All, Ω = Bonferroni corrected P<0.05 vs. PSP-All, ϕ = Bonferroni corrected P<0.05 vs. CBS-AD. \* = White control frequencies derived from dbSNP, \*\* = data from the Tracking Parkinson's study.

**eTable 5. Volumetric MRI Measures in the PROSPECT Study Natural History Cohort**

|                                     | Controls          | PSP-<br>All         | PSP-<br>RS        | PSP-<br>Subcortical | PSP-<br>Cortical    | CBS-<br>All         | CBS-<br>unknown    | CBS-<br>4RT         | CBS-<br>AD          | IDT                | p-value             |
|-------------------------------------|-------------------|---------------------|-------------------|---------------------|---------------------|---------------------|--------------------|---------------------|---------------------|--------------------|---------------------|
| <b>n</b>                            | 35                | 44                  | 25                | 11                  | 8                   | 17                  | 7                  | 5                   | 5                   | 12                 |                     |
| <b>Pons-<br/>Midbrain<br/>ratio</b> | 2.45<br>(0.22)    | 2.60*<br>(0.24)     | 2.61*<br>(0.23)   | 2.61<br>(0.22)      | 2.55<br>(0.23)      | 2.48<br>(0.23)      | 2.57<br>(0.22)     | 2.40<br>(0.22)      | 2.44<br>(0.22)      | 2.52<br>(0.22)     | 2.46e <sup>-9</sup> |
| <b>Pons</b>                         | 14.72<br>(1.70)   | 13.25**<br>(1.76)   | 13.06**<br>(1.71) | 13.70<br>(1.70)     | 13.17*<br>(1.75)    | 13.67*<br>(1.68)    | 14.09<br>(1.67)    | 13.73<br>(1.66)     | 13.57<br>(1.66)     | 14.55<br>(1.66)    | 2.73e <sup>-9</sup> |
| <b>Midbrain</b>                     | 5.99<br>(0.53)    | 5.09**<br>(0.54)    | 5.01**<br>(0.54)  | 5.23**<br>(0.54)    | 5.16**<br>(0.55)    | 5.54*<br>(0.52)     | 5.54<br>(0.52)     | 5.73<br>(0.52)      | 5.55<br>(0.52)      | 5.77<br>(0.52)     | 5.99e <sup>-7</sup> |
| <b>Medulla</b>                      | 4.47<br>(0.43)    | 3.99**<br>(0.44)    | 3.94**<br>(0.43)  | 4.09*<br>(0.43)     | 4.03*<br>(0.44)     | 4.27<br>(0.42)      | 4.38<br>(0.42)     | 4.16<br>(0.42)      | 4.41<br>(0.42)      | 4.29<br>(0.42)     | 0.003               |
| <b>Cerebellum</b>                   | 103.10<br>(9.84)  | 99.95<br>(10.35)    | 102.24<br>(9.86)  | 102.24<br>(9.86)    | 94.88*<br>(10.18)   | 99.70<br>(9.91)     | 101.47<br>(9.66)   | 98.33<br>(9.62)     | 101.77<br>(9.61)    | 103.72<br>(9.63)   | 1.96e <sup>-4</sup> |
| <b>Frontal<br/>Lobe</b>             | 155.76<br>(11.12) | 144.06**<br>(11.78) | 150.79<br>(11.14) | 150.79<br>(11.14)   | 133.94**<br>(11.50) | 137.95**<br>(11.28) | 141.90*<br>(10.92) | 138.12**<br>(10.88) | 135.24**<br>(10.87) | 144.94*<br>(10.89) | 1.25e <sup>-5</sup> |

|                           |                   |                     |                   |                   |                    |                     |                  |                   |                    |                   |                     |
|---------------------------|-------------------|---------------------|-------------------|-------------------|--------------------|---------------------|------------------|-------------------|--------------------|-------------------|---------------------|
| <b>Parietal Lobe</b>      | 103.75<br>(9.22)  | 99.14*<br>(10.38)   | 102.26<br>(9.23)  | 102.26<br>(9.23)  | 90.10**<br>(9.53)  | 86.73**<br>(9.94)   | 95.29<br>(9.05)  | 76.99**<br>(9.02) | 88.34**<br>(9.01)  | 97.47*<br>(9.02)  | 3.89e <sup>-8</sup> |
| <b>Temporal Lobe</b>      | 115.03<br>(10.12) | 106.83**<br>(10.67) | 109.23<br>(10.13) | 109.23<br>(10.13) | 99.87**<br>(10.46) | 100.79**<br>(10.22) | 109.60<br>(9.93) | 95.18**<br>(9.89) | 99.89*<br>(9.88)   | 106.91*<br>(9.90) | 1.98e <sup>-4</sup> |
| <b>Occipital Lobe</b>     | 47.30<br>(4.87)   | 45.58<br>(5.19)     | 46.49<br>(4.88)   | 46.49<br>(4.88)   | 41.97*<br>(5.03)   | 43.34*<br>(4.97)    | 48.29<br>(4.78)  | 40.28**<br>(4.76) | 42.09*<br>(4.76)   | 42.63*<br>(4.76)  | 0.003               |
| <b>Central Structures</b> | 41.56<br>(3.56)   | 36.33**<br>(3.56)   | 36.35**<br>(3.57) | 36.35**<br>(3.57) | 35.01**<br>(3.69)  | 36.54**<br>(3.41)   | 37.07*<br>(3.50) | 37.42*<br>(3.49)  | 36.96*<br>(3.48)   | 38.81*<br>(3.49)  | 1.42e <sup>-5</sup> |
| <b>Ventricles</b>         | 35.80<br>(19.25)  | 48.76*<br>(20.42)   | 39.56<br>(19.28)  | 39.56<br>(19.28)  | 57.01*<br>(19.91)  | 59.83**<br>(19.56)  | 44.93<br>(18.90) | 60.81*<br>(18.83) | 75.75**<br>(18.81) | 48.53*<br>(18.84) | 2.25e <sup>-4</sup> |

Volumetric MRI measures in the PROSPECT study natural history cohort. Indeterminate: IDT, PSP-Richardson syndrome: PSP-RS, CBS-Alzheimer's disease: CBS-AD, CBS-4 repeat tau: CBS-4RT. Marginal mean volumes in ml (and standard deviation). Final column p-value of the overall F-test from between subjects design including total intracranial volume, age at scan and sex. Other within-cell p-values are FDR adjusted. \*\* = P<0.001, \* = P<0.05 from t-test comparing each group to controls.

## eMethods. Fluid Biomarkers, Genetics, and Neuroimaging

**Fluid biomarkers:** We processed non-fasting blood and CSF samples using standardised protocols and stored 0.5ml aliquots at -80°C within 60 minutes of sample collection. We measured serum NF-L using an ultrasensitive single molecule array (Simoa) assay.<sup>1</sup> In addition, where available, CSF samples from cases were tested for total tau (T-tau) and A $\beta$ 1-42 levels (INNOTEST ELISA – Fujirebio Europe N.V., Gent, Belgium).<sup>2</sup> A subset of PD cases from the Tracking Parkinson’s study underwent baseline serum NF-L testing using the Simoa assay.

**Genetics:** DNA was extracted from blood samples of PSP, CBS, IDT and PD cases. DNA samples subsequently underwent genotyping at UCL Institute of Child Health using the Illumina NeuroChip<sup>3</sup> for white PROSPECT cases and the Illumina Human Core Exome array<sup>4</sup> for white Tracking Parkinson’s cases. Standard steps taken for data quality control and single nucleotide polymorphism imputation, as previously described.<sup>5</sup> White control allele/haplotype frequencies were derived from dbSNP ([www.ncbi.nlm.nih.gov/snp](http://www.ncbi.nlm.nih.gov/snp)). *MAPT* H1/H1 (determined by rs1800547 genotype), *TRIM11* (determined by rs564309 minor allele frequency) and *APOE-ε4* allele (determined by rs429358 and rs7412 genotypes) frequencies were calculated using our imputed genetic datasets.

**Neuroimaging:** Scan protocols were designed at the outset of the study to closely match across centres, based on the international Genetic Frontotemporal Dementia Initiative protocols (MP-RAGE, TR 2s, TE 2.93ms, Flip angle 8deg, 1.1mm isotropic).<sup>6</sup> T1-weighted images were processed using the recon-all pipeline with brainstem structures of FreeSurfer v6.0.0 ([surfer.nmr.mgh.harvard.edu](http://surfer.nmr.mgh.harvard.edu)) into subcortical segments and cortical surface parcellations. Regional analyses were performed using volume measures from 68 Desikan-Killiany atlas cortical regions and 38 subcortical volume measures from the segmentation.<sup>7,8</sup> We combined volume measures from the parcellation to calculate cortical grey matter volumes of the frontal, temporal, parietal, occipital lobes. Hippocampi and amygdalae volumes are included in the temporal lobe data. The remaining segmentation regions were combined into central structures (basal ganglia, thalamus, accumbens), cerebellar grey matter, brainstem, and ventricles. The images were additionally segmented into grey, white and CSF modulated probability maps using CAT12 ([neuro.uni-jena.de/cat](http://neuro.uni-jena.de/cat)) in order to obtain total intracranial volume (TIV) measures. We also calculated the ratio of the pons to midbrain volume.

**eFigure. Serum NF-L ROC Curve for APS vs PD**

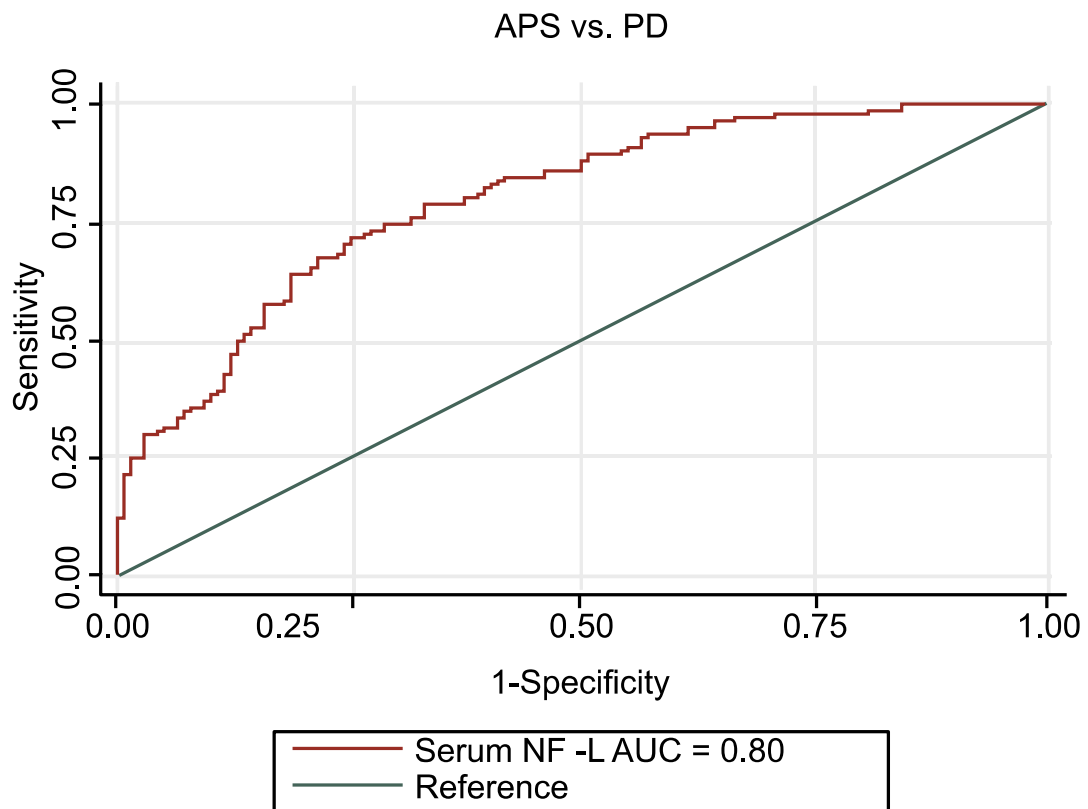

Receiver operating characteristic (ROC) curve for distinguishing APS from PD using serum NF-L. Atypical parkinsonian syndrome (consisting of all PSP and CBS cases): APS, Parkinson's disease: PD, neurofilament light chain: NF-L, area under the curve: AUC.



## **eReferences:**

1. Kuhle J, Barro C, Andreasson U, et al. Comparison of three analytical platforms for quantification of the neurofilament light chain in blood samples: ELISA, electrochemiluminescence immunoassay and Simoa. *Clin Chem Lab Med* 2016; 54(10): 1655-1661.
2. Faull M, Ching SY, Jarmolowicz AI, Beilby J, Panegyres PK. Comparison of two methods for the analysis of CSF A $\beta$  and tau in the diagnosis of Alzheimer's disease. *Am J Neurodegener Dis* 2014; 3(3): 143-151.
3. Blauwendraat C, Faghri F, Pihlstrom L, et al. NeuroChip, an updated version of the NeuroX genotyping platform to rapidly screen for variants associated with neurological diseases. *Neurobiol Aging* 2017; 57: e9-e247.
4. Guo Y, He J, Zhao S, et al. Illumina human exome genotyping array clustering and quality control. *Nat Protoc* 2014; 9: 2643-62.
5. Reed E, Nunez S, Kulp D, Qian J, Reilly MP, Foulkes AS. A guide to genome-wide association analysis and post-analytic interrogation. *Stat Med* 2015; 34: 3769-92.
6. Rohrer JD, Nicholas JM, Cash DM, van Swieten J, Dopper E, Jiskoot L, et al. Presymptomatic cognitive and neuroanatomical changes in genetic frontotemporal dementia in the Genetic Frontotemporal dementia Initiative (GENFI) study: a cross-sectional analysis. *Lancet Neurol* 2015; 14(3): 253-262.
7. Fischl B, Salat DH, Busa E, et al. Whole brain segmentation: automated labeling of neuroanatomical structures in the human brain. *Neuron* 2002; 33(3): 341-355.
8. Iglesias JE, Van Leemput K, Bhatt P, et al. Bayesian segmentation of brainstem structures in MRI. *Neuroimage* 2015; 113: 184-195.
